# Supplementary material for: Right-lateralized fronto-parietal network and phasic alertness in healthy aging
Source: PubMed Central journal article supplement (PMC7075959; doi:10.1038/s41598-020-61844-z), 2020-03-16
Supplement: 41598_2020_61844_MOESM1_ESM.pdf [file 41598_2020_61844_MOESM1_ESM.pdf]

### Right-lateralized fronto-parietal network and phasic alertness in healthy aging

Marleen Haupt, Adriana L. Ruiz-Rizzo, Christian Sorg, and Kathrin Finke

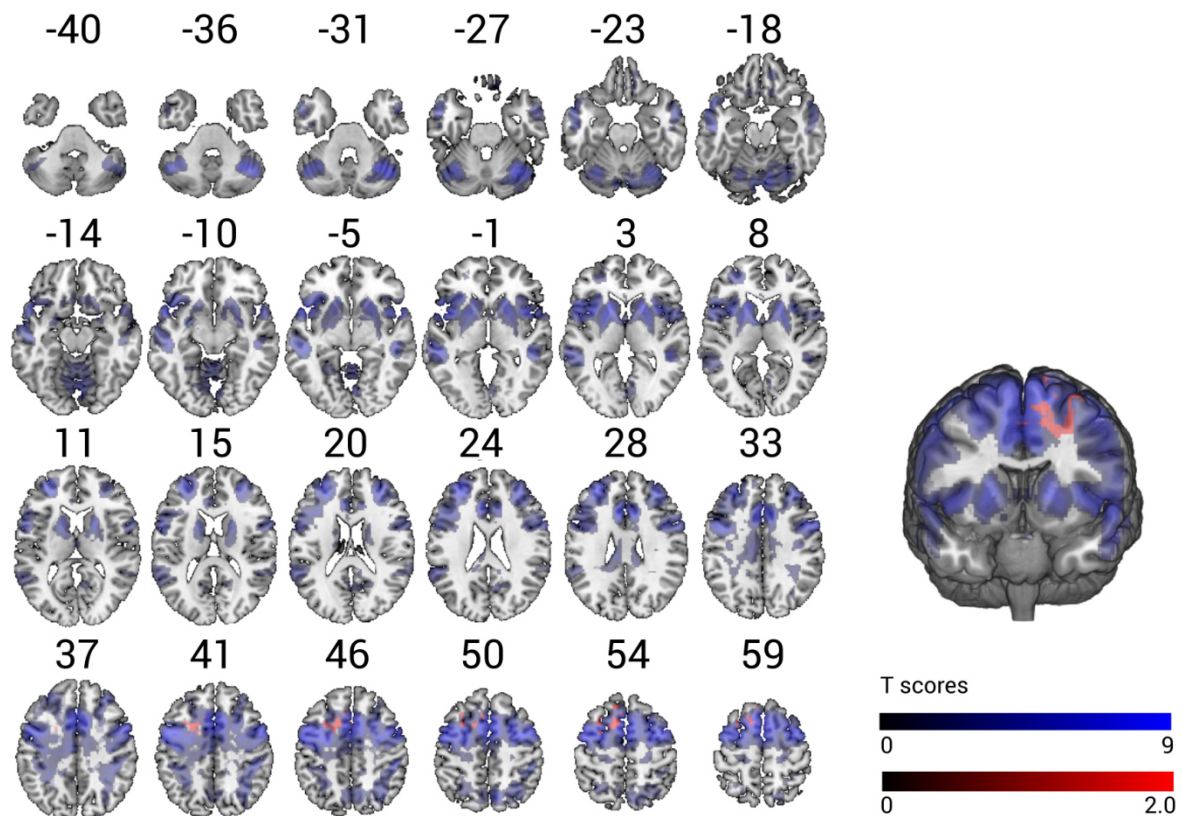

*Figure S1.* IFC in the auditory network in older healthy participants. The clusters significantly related to phasic alerting effects (red) are overlaid on intra-network iFC (blue). The spatial maps are obtained by a combined independent component analysis dual regression approach. Behaviour-iFC associations were tested using a voxel-wise multiple regression, controlling for age, sex, head motion, and education ( $p < .05$  FWE corrected at cluster level). The results are presented on a standard anatomical MNI152 template using MRICroGL (<https://www.mccauslandcenter.sc.edu/mricrogl/source>); slice numbers in transverse plane are indicated.

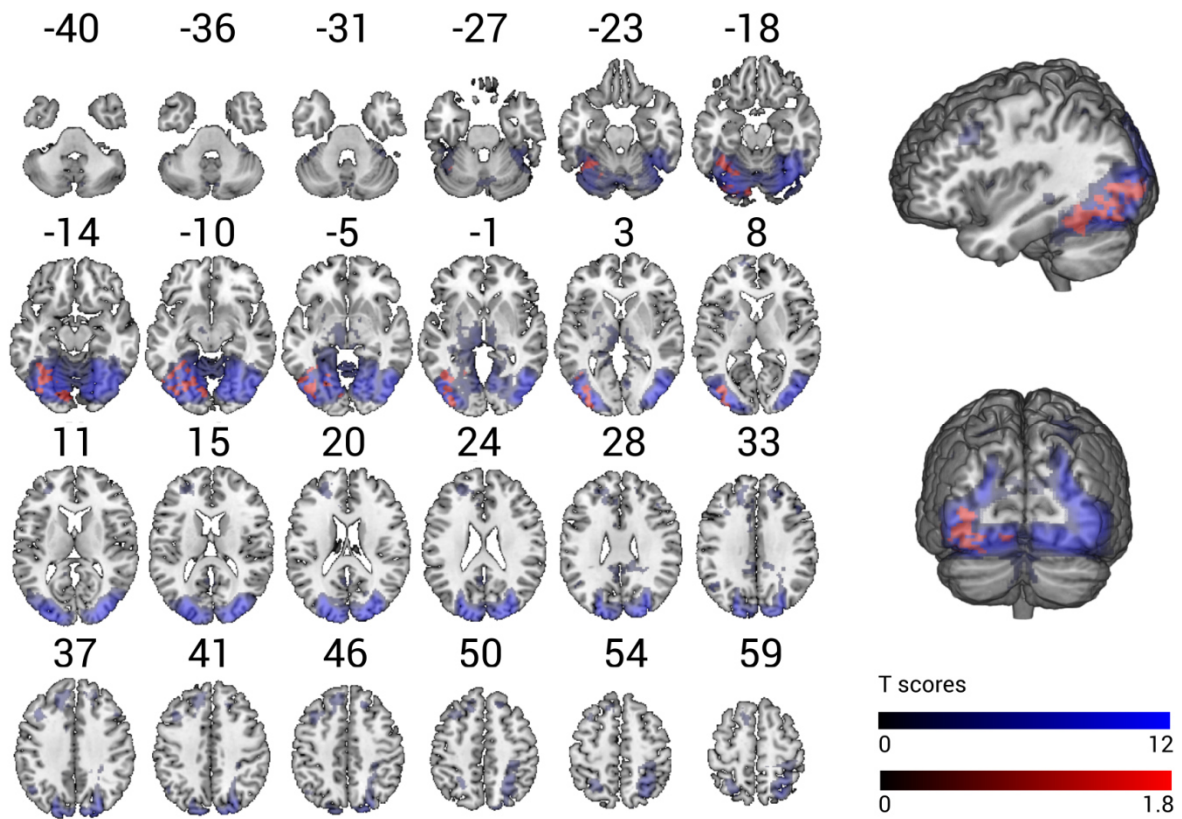

*Figure S2.* IFC in visual network I in older healthy participants. The clusters significantly related to phasic alerting effects (red) are overlaid on intra-network iFC (blue). The spatial maps are obtained by a combined independent component analysis dual regression approach. Behaviour-iFC associations were tested using a voxel-wise multiple regression, controlling for age, sex, head motion, and education ( $p < .05$  FWE corrected at cluster level). The results are presented on a standard anatomical MNI152 template using MRICroGL (<https://www.mccauslandcenter.sc.edu/mricrogl/source>); slice numbers in transverse plane are indicated.

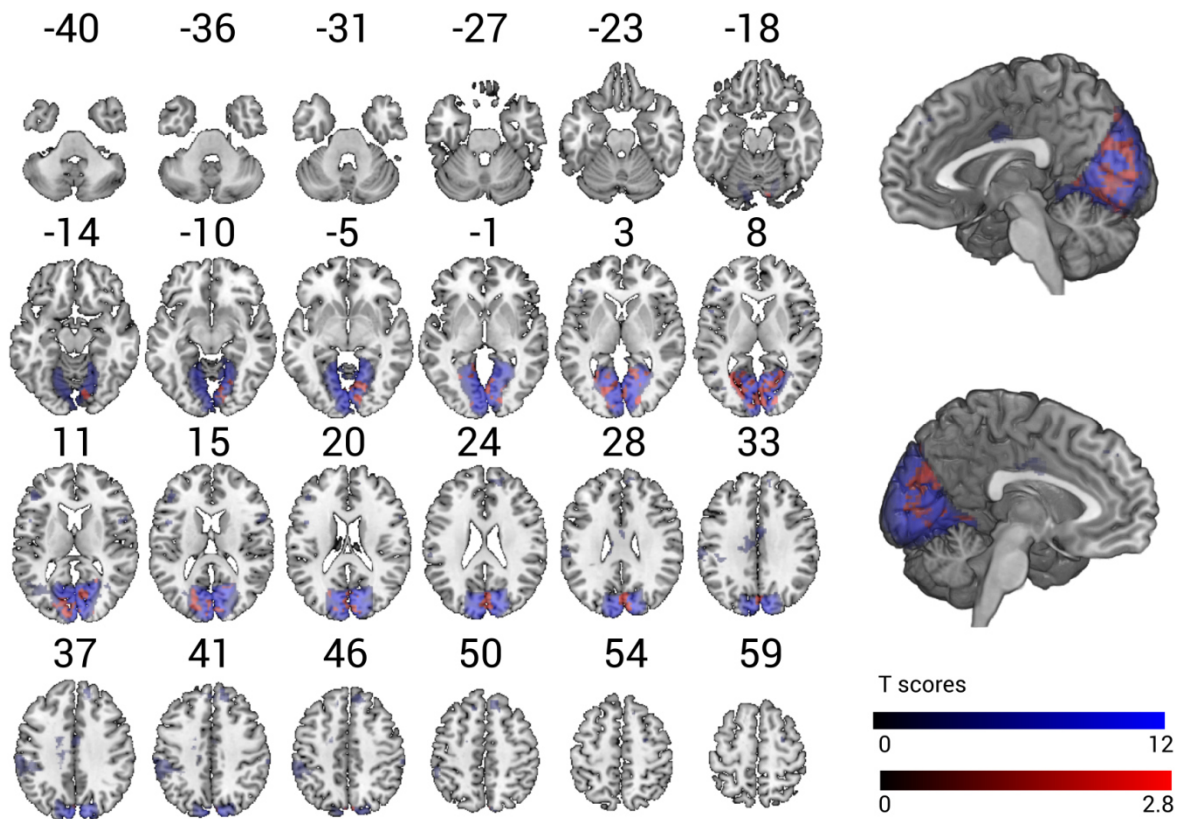

*Figure S3.* IFC in visual network II in older healthy participants. The clusters significantly related to phasic alerting effects (red) are overlaid on intra-network iFC (blue). The spatial maps are obtained by a combined independent component analysis dual regression approach. Behaviour-iFC associations were tested using a voxel-wise multiple regression, controlling for age, sex, head motion, and education ( $p < .05$  FWE corrected at cluster level). The results are presented on a standard anatomical MNI152 template using MRICroGL (<https://www.mccauslandcenter.sc.edu/mricrogl/source>); slice numbers in transverse plane are indicated.

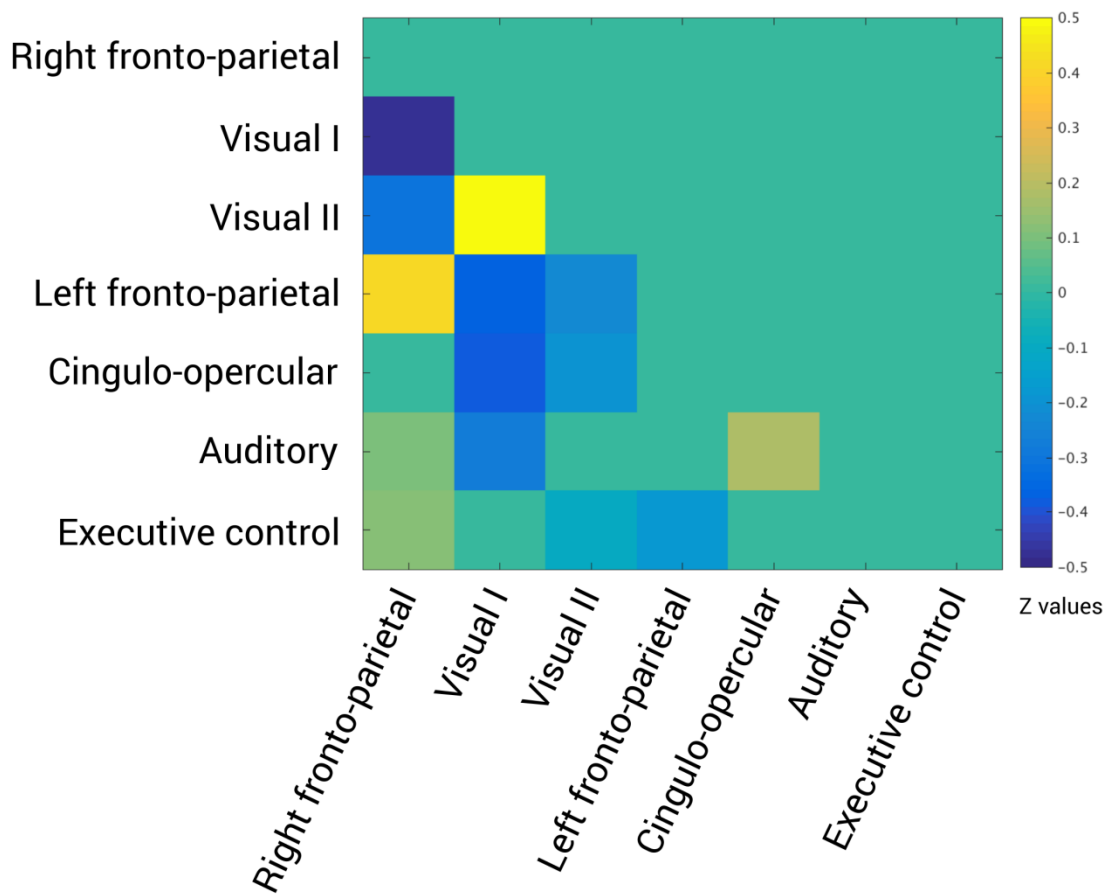

*Figure S4.* Inter-network connectivity of the cingulo-opercular, right fronto-parietal network, other attention-related, auditory, and visual networks. The figure displays results of one-sample t-tests ( $p < .05$ , FDR corrected for multiple comparisons) of the correlations between all networks. Positive correlations are highlighted by warm colours; negative correlations are represented by cool colours. The colour bar indicates mean Fisher r-to-z transformed values.

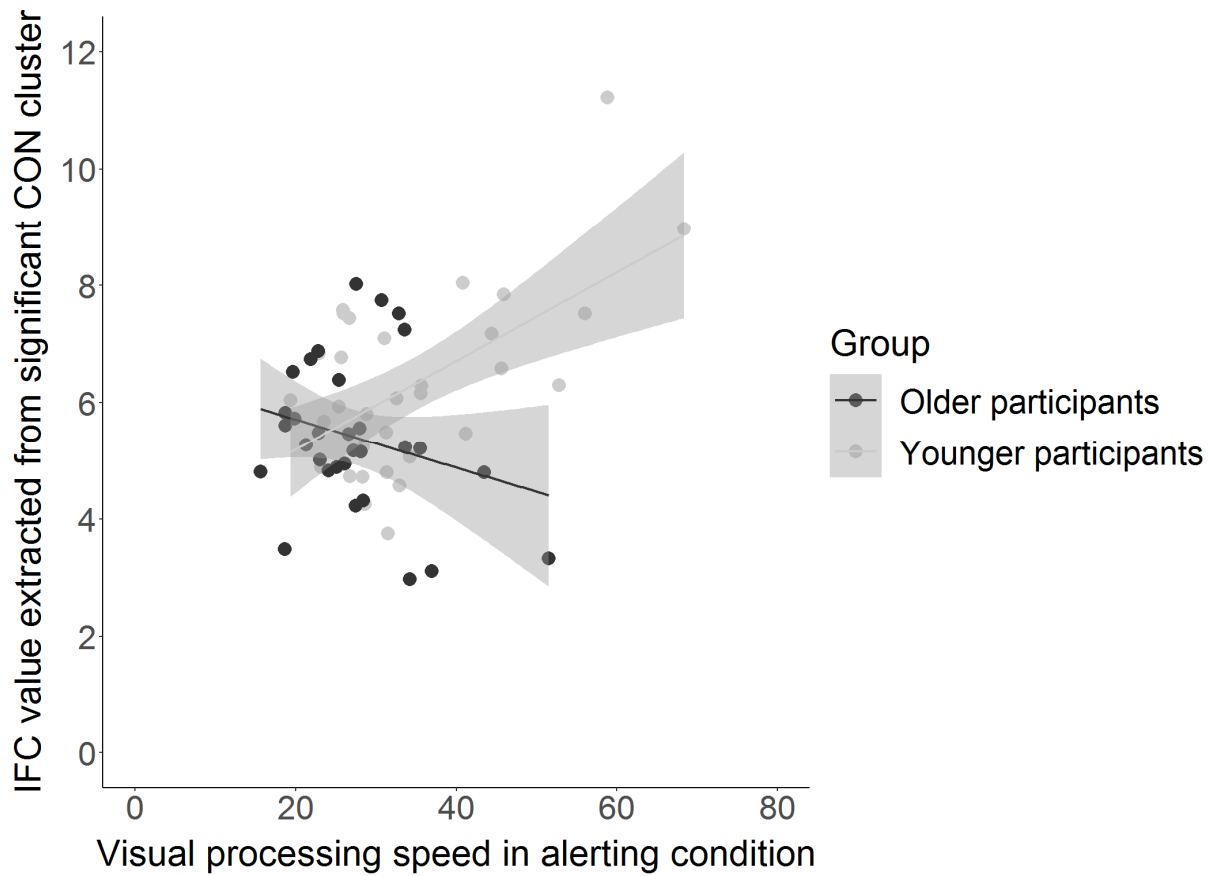

*Figure S5.* Age group specific behaviour-iFC associations in the cingulo-opercular network. Intrinsic functional connectivity values are extracted from the significant cluster in the cingulo-opercular network (peak MNI coordinates in mm: [14 40 16], cluster size: 1061 voxels,  $T=4.20$ ,  $Z=3.90$ ,  $p<.05$  FWE cluster-corrected). The shaded areas around the linear regression lines represent 95% confidence regions.
